# Supplementary material
Source: Springer Nature journal article supplement (https://www.springermedizin.de/resource/supplementary/12958_2011_907_MOESM6_ESM.pdf/9568766)

(A)

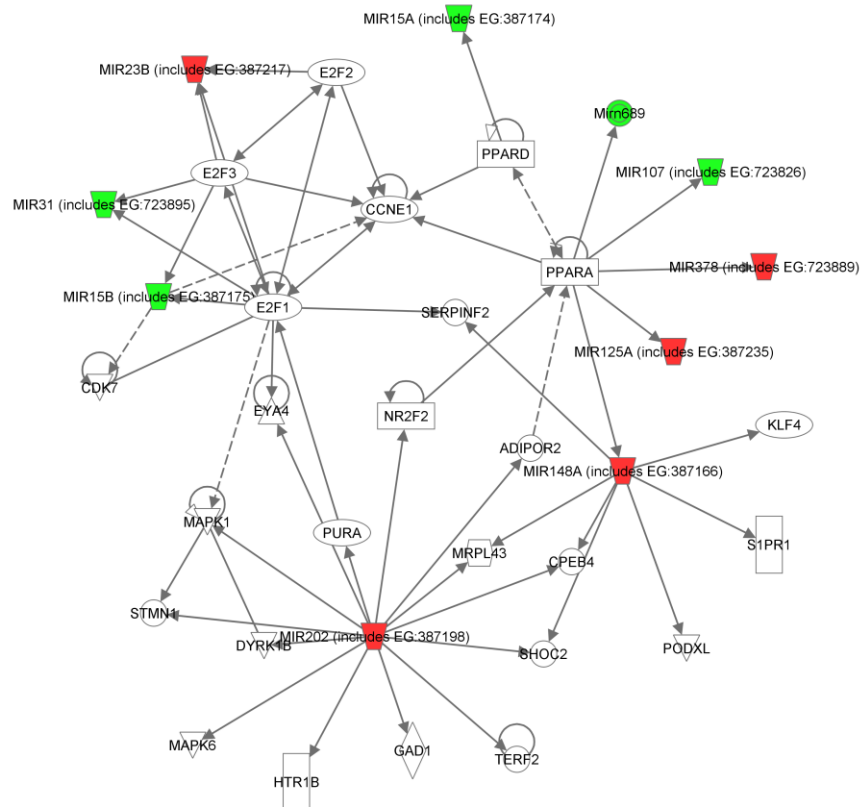

(B)

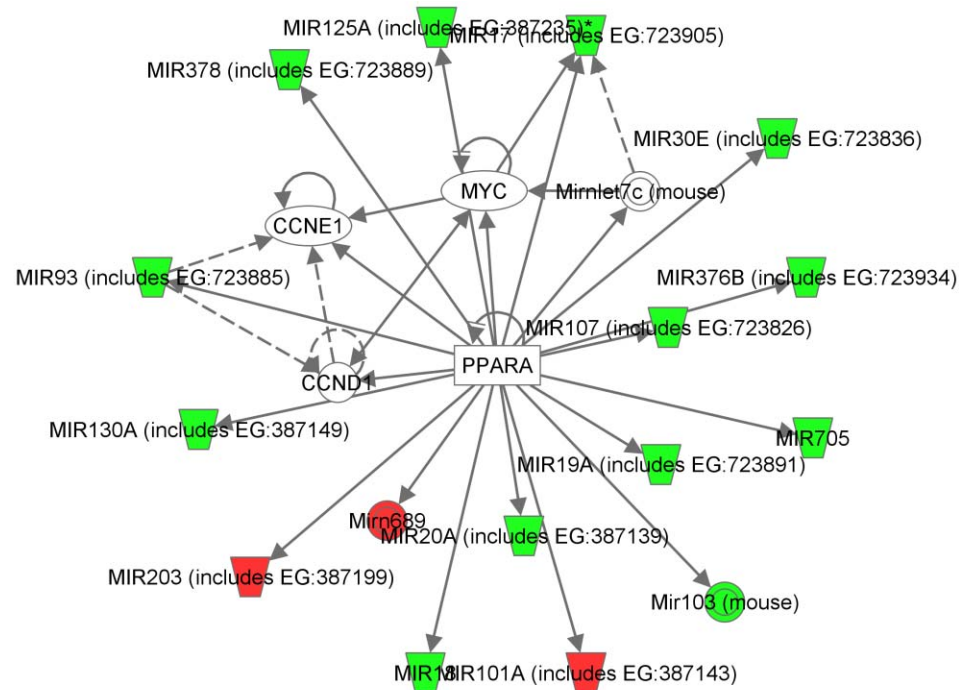

Supplement: MOESM6 [file 9568766]
